# Supplementary material for: Altered AKAP12 expression in portal fibroblasts and liver sinusoids mediates transition from hepatic fibrogenesis to fibrosis resolution
Source: PubMed Central journal article supplement — Exp Mol Med. 2018 Apr 27;50(4):48. doi: 10.1038/s12276-018-0074-5 (PMC5938025; doi:10.1038/s12276-018-0074-5), 2018-04-27

## Supplementary figure legends

**Supplementary Figure 1. Double immunostaining of normal mouse liver sections for AKAP12 and other cell type markers.** (a) Double immunostaining for AKAP12 with markers for portal fibroblasts (Des, top row; PDGRFa, second row) and endothelial cells (CD31, third row), and bile duct epithelium (EpCAM, bottom row) reveals that AKAP12-positive cells in portal area are portal fibroblasts while they are rarely colocalized with bile duct epithelium or portal vein endothelium. (b) Double immunostainings for AKAP12 with sinusoidal basement membrane marker collagen type IV (ColIV) and HSC marker desmin (Des) indicate that HSCs are negative for AKAP12. Scale bars represent 50um.

**Supplementary Figure 2. Liver sinusoids of AKAP12 KO mice have reduced number of fenestrae in normal condition and DDC diet leads to reduction of AKAP12 expression.** (a) Representative scanning electron microscopy of WT and AKAP12 KO liver sinusoids and a graph showing the numbers of fenestrae per unit vascular area. n=18-20 SEM images from 2 mice per genotype. Scale bar, 1um. Data are expressed as means±SEM. \*\*P<0.01. (b) DDC challenge for 3 weeks results in ECM accumulation around portal track while AKAP12 expression is reduced. \*\*P<0.01. Scale bars indicate 500um in Sirius Red image and 100um in AKAP12 staining. (c) Biliary tree (BT) and non-parenchymal cells (NPCs) are isolated after intrahepatic collagenase perfusion and AKAP12 expression was determined by Western blot. Note that 3 weeks of DDC diet (DDC 3W) leads to reduced AKAP12 expression in both BT and NPCs samples.

**Supplementary Figure 3. Serum levels of liver enzymes in AKAP12 KO mice are comparable to WT mice.** ALT (a), AST (b) and ALP (c) levels in serum of WT or AKAP12 KO mice after normal diet (ND), DDC diet 3 weeks (DDC 3W) or DDC 3 weeks followed by normal diet for 2 weeks (RES 2W) were measured. n=5-6 mice per group.

**Supplementary Table 1.** The clinical information of human subjects included in this study

|                                   | <b>Normal</b> | <b>HBV</b> | <b>HCV</b> | <b>NBNC</b> |
|-----------------------------------|---------------|------------|------------|-------------|
| <b>All (n)</b>                    | 4             | 8          | 8          | 8           |
| <b>Sex (males)</b>                | 2 (50%)       | 5 (62.5%)  | 5 (62.5%)  | 2 (25%)     |
| <b>Age (years)</b>                | 25±6          | 51.4±13.6  | 57.5±13.5  | 56.9±13.1   |
| <b>Fibrosis grade (0/1/2/3/4)</b> | 4/0/0/0/0     | 0/2/2/2/2  | 0/2/2/2/2  | 0/2/2/2/2   |

**Supplementary Table 2.** Primer sequences for qPCR detection

mouse primers

| Gene            |           | Sequences (5'→3')    |
|-----------------|-----------|----------------------|
| <i>col1a1</i>   | sense     | CATGTTCACTTTGTGGACCT |
|                 | antisense | GCAGCTGACTTCAGGGATGT |
| <i>col3a1</i>   | sense     | TCCCCTGGAATCTGTGAATC |
|                 | antisense | TGAGTCGAATTGGGGAGAAT |
| <i>col15a1</i>  | sense     | GATTTACGGGTTCCATACAA |
|                 | antisense | GACTTCATCCATCTCCTGAA |
| $\alpha$ SMA    | sense     | GACACCACCCACCCAGAGT  |
|                 | antisense | ACATAGCTGGAGCAGCGTCT |
| <i>fibulin1</i> | sense     | ACGGCCGGTCTTGTGAAGAT |
|                 | antisense | TCGTCGGCAATAGCACTGGT |
| <i>elastin</i>  | sense     | GGGCCCTGGTATTGGAGGTC |
|                 | antisense | ACTCCACCTCTGGCTCCGTA |
| <i>vWF</i>      | sense     | AGACACAGTGAAGATTGGCT |
|                 | antisense | GGAACAGGTACTTGAGTCCA |
| <i>ET-1</i>     | sense     | GGCAGGACCAGCATCCTTGA |
|                 | antisense | GAGGCAGAAAGGCACTCGCT |
| <i>hgf</i>      | sense     | CACCACACCGGCACAAGTTC |
|                 | antisense | CCCAAGTGGTGTGAGGGTCA |
| <i>wnt2</i>     | sense     | GGACGTGCACACATGCAAGG |
|                 | antisense | ACCCAGAGGTCCAGTGTCT  |
| <i>vegf-a</i>   | sense     | TTACTGCTGTACCTCCACC  |
|                 | antisense | ACAGGACGGCTTGAAGATG  |
| <i>pde4a</i>    | sense     | TGAGCTCACCTTGGAGGAAG |
|                 | antisense | ATCATGTGGAGCCAGGAGAG |
| <i>pde4b</i>    | sense     | GCTCAAGCCTGAACAACACA |
|                 | antisense | GTTCAAGTCTTCCAGCTCCT |
| <i>pde4c</i>    | sense     | GGGTCCAGACAGATCAGGAG |
|                 | antisense | GCTCAGCCACTTTGAACACA |
| <i>pde4d</i>    | sense     | GCGTGGCATGGAGATAAGTC |
|                 | antisense | CGTCTCCAGAGTGGATGAA  |
| <i>akap12</i>   | sense     | GTCTGGAATGCAGGATGAGG |
|                 | antisense | GATCCGACACAAATCAACGC |
| <i>gapdh</i>    | sense     | TGAACGGGAAGCTCACTGG  |
|                 | antisense | TCCACCACCCTGTTGCTGTA |

human primers

| Gene            |           | Sequences (5'→3')      |
|-----------------|-----------|------------------------|
| <i>ET-1</i>     | sense     | GACATCATTTGGGTCAACACTC |
|                 | antisense | GGCATCTATTTTCACGGTCTGT |
| <i>lama1</i>    | sense     | CAGACTTTGGATGAAGATTTCC |
|                 | antisense | AGTTCAAGGGTGGCATTITG   |
| <i>lama5</i>    | sense     | AACAACCTCGCCGAGGGCTG   |
|                 | antisense | AGTGGGTTCCCAAAGAATCC   |
| <i>akap12</i>   | sense     | CAGAAGTCAGAGCAAGTGCC   |
|                 | antisense | ACCTGAGGGGGAACATTTGA   |
| <i>18S rRNA</i> | sense     | GTAACCCGTTGAACCCCAT    |
|                 | antisense | CCATCCAATCGGTAGTAGCG   |

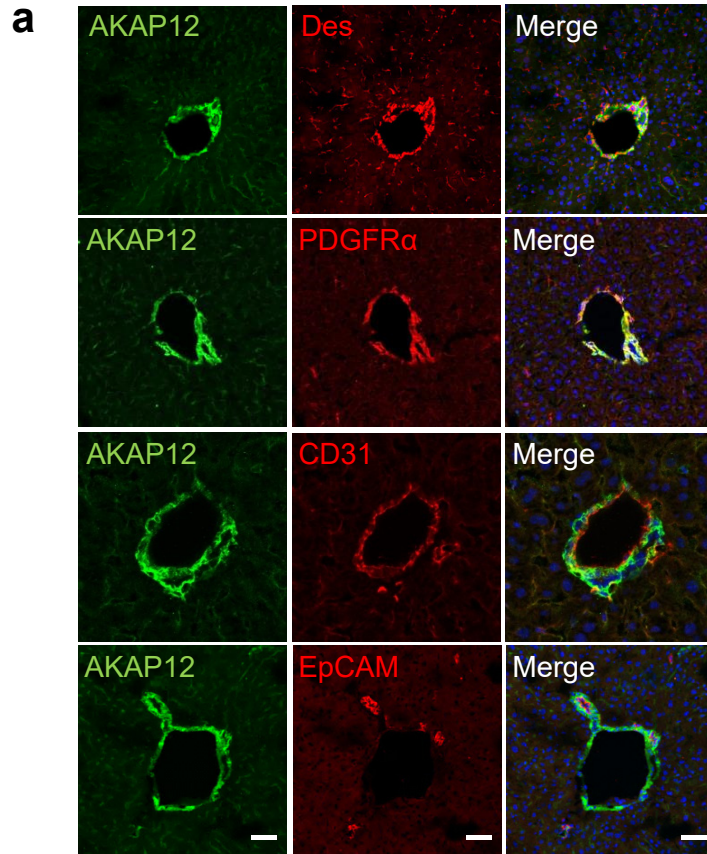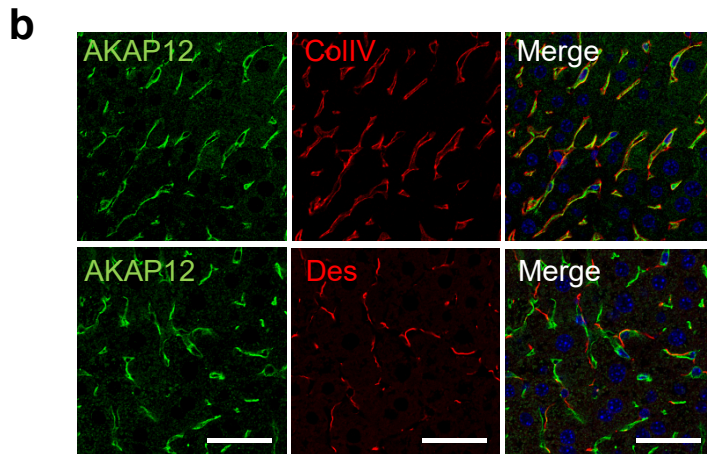

**a**

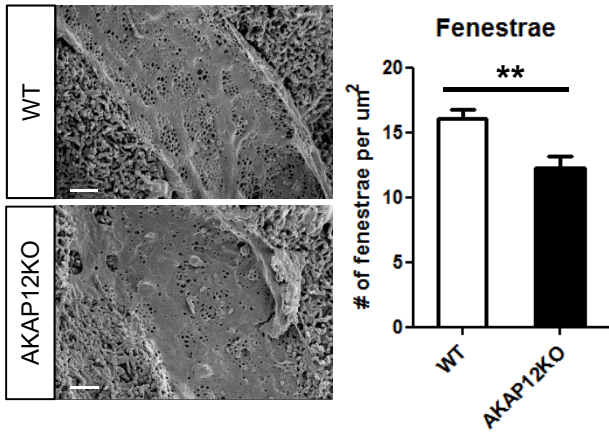

**b**

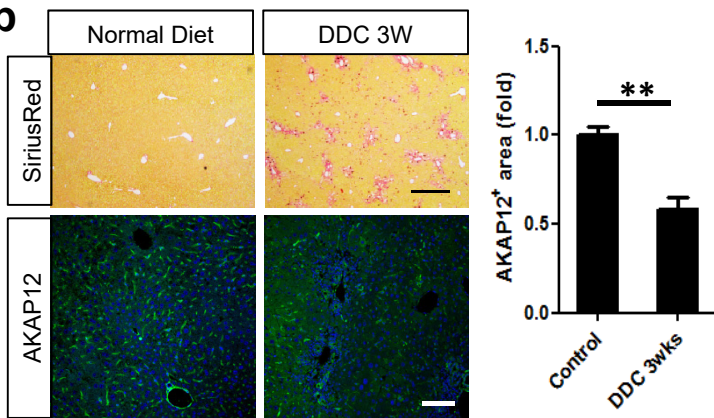

**c**

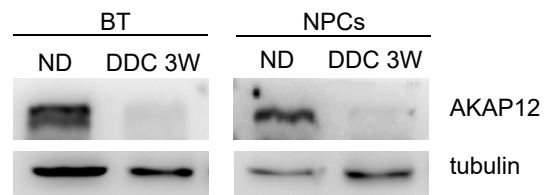

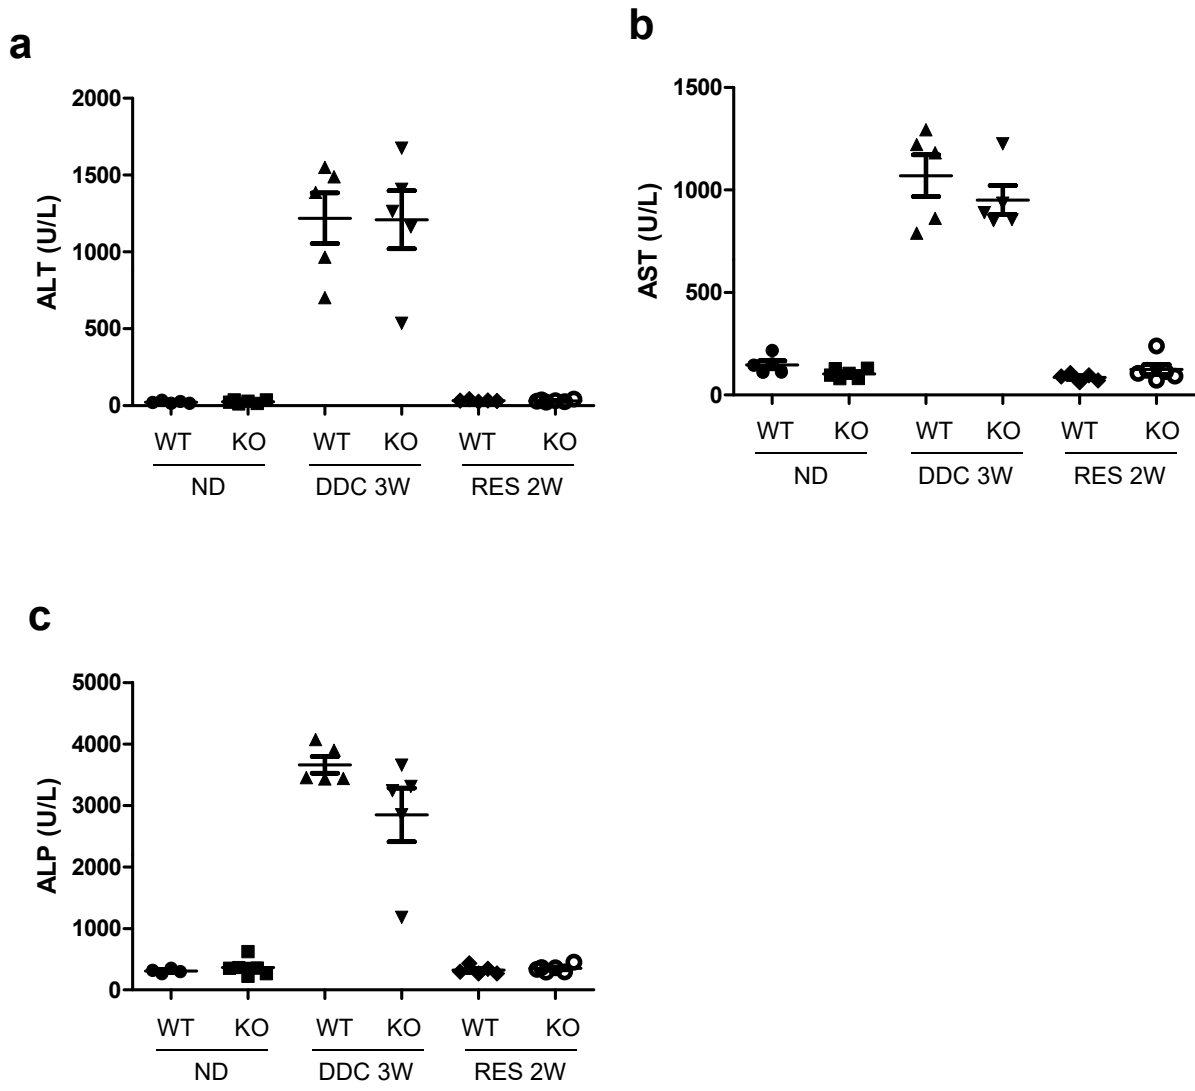

Supplement: 12276_2018_74_MOESM1_ESM.pdf [file 12276_2018_74_MOESM1_ESM.pdf]
